# Supplementary material
Source: PubMed Central journal article supplement (PMC1852335)
Supplement: biophysj_106.099440_1.pdf [file biophysj_106.099440_1.pdf]

## Proteins used in the analysis and their size distribution:

The size distribution of the 595 non-homologous proteins used in the analysis is follows:

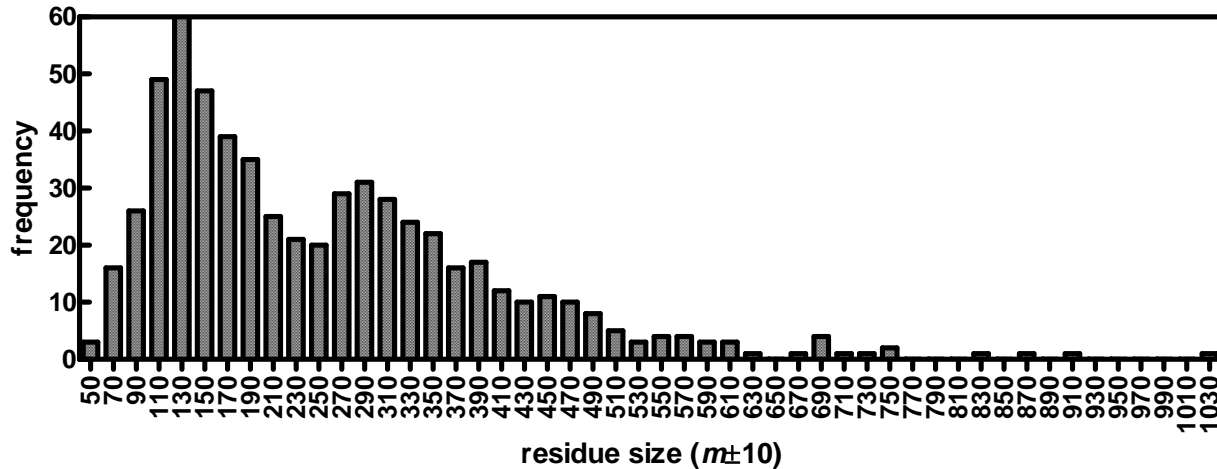

The protein data bank ID, chain ID, and the size of the proteins are listed below:

| Protein  | Chain | Size |
|----------|-------|------|----------|-------|------|----------|-------|------|----------|-------|------|
| 5rxn.pdb | -     | 54   | 1beo.pdb | -     | 98   | 1rtp.pdb | I     | 109  | 2mad.pdb | L     | 124  |
| 1aaf.pdb | -     | 55   | 1aps.pdb | -     | 98   | 1jer.pdb | -     | 108  | 2phy.pdb | -     | 125  |
| 1dtx.pdb | -     | 58   | 1cyu.pdb | -     | 98   | 1msa.pdb | A     | 109  | 1bw4.pdb | -     | 125  |
| 1tfs.pdb | -     | 60   | 1tii.pdb | D     | 98   | 1bnd.pdb | A     | 109  | 2acg.pdb | -     | 125  |
| 1tqx.pdb | A     | 60   | 1prt.pdb | F     | 98   | 1exg.pdb | -     | 110  | 1otg.pdb | A     | 125  |
| 1pi2.pdb | -     | 61   | 2ncm.pdb | -     | 99   | 1hcn.pdb | B     | 110  | 2vil.pdb | -     | 126  |
| 1cse.pdb | I     | 63   | 2hpe.pdb | A     | 99   | 1prt.pdb | D     | 110  | 1eal.pdb | -     | 127  |
| 1ptx.pdb | -     | 64   | 1hvk.pdb | A     | 99   | 1ccr.pdb | -     | 111  | 1rie.pdb | -     | 127  |
| 2bbi.pdb | -     | 71   | 2kau.pdb | B     | 101  | 2pii.pdb | -     | 112  | 2ccy.pdb | A     | 127  |
| 1hrz.pdb | A     | 73   | 1fim.pdb | -     | 103  | 2tgi.pdb | -     | 112  | 1ttb.pdb | A     | 127  |
| 1hcp.pdb | -     | 75   | 1tlk.pdb | -     | 103  | 1irs.pdb | A     | 112  | 1doi.pdb | -     | 128  |
| 1iml.pdb | -     | 76   | 1umu.pdb | A     | 103  | 1pls.pdb | -     | 113  | 3chy.pdb | -     | 128  |
| 1cdq.pdb | -     | 77   | 1lts.pdb | D     | 103  | 1dyn.pdb | A     | 113  | 1agr.pdb | E     | 128  |
| 1vcc.pdb | -     | 77   | 1tbr.pdb | R     | 103  | 1kpb.pdb | A     | 113  | 1cpq.pdb | -     | 129  |
| 1cdr.pdb | -     | 77   | 1rga.pdb | -     | 104  | 2hmz.pdb | A     | 114  | 193L.pdb | -     | 129  |
| 1lfb.pdb | -     | 77   | 9rnt.pdb | -     | 104  | 4rhk.pdb | -     | 115  | 1msc.pdb | -     | 129  |
| 1kve.pdb | B     | 77   | 1mhl.pdb | A     | 104  | 1rmd.pdb | -     | 116  | 1mut.pdb | -     | 129  |
| 1nkl.pdb | -     | 78   | 1cmb.pdb | A     | 104  | 1hce.pdb | -     | 118  | 1rcb.pdb | -     | 129  |
| 1cks.pdb | B     | 78   | 1trr.pdb | A     | 104  | 1com.pdb | B     | 118  | 1rcp.pdb | A     | 129  |
| 1cea.pdb | A     | 80   | 1erw.pdb | -     | 105  | 1rfb.pdb | A     | 119  | 2aza.pdb | A     | 129  |
| 1pba.pdb | -     | 81   | 2pld.pdb | A     | 105  | 1hfh.pdb | -     | 120  | 1lzz.pdb | -     | 130  |
| 1npo.pdb | A     | 81   | 2psp.pdb | A     | 105  | 1tam.pdb | -     | 120  | 1sei.pdb | A     | 130  |
| 1srs.pdb | A     | 84   | 1kpt.pdb | A     | 105  | 2rsl.pdb | B     | 120  | 1lid.pdb | -     | 131  |
| 1hcn.pdb | A     | 85   | 2ple.pdb | A     | 105  | 2pf1.pdb | -     | 121  | 1lit.pdb | -     | 131  |
| 2bop.pdb | A     | 85   | 1msf.pdb | C     | 105  | 2gmf.pdb | A     | 121  | 1hmt.pdb | -     | 131  |
| 1zaa.pdb | C     | 85   | 1mse.pdb | C     | 105  | 1sri.pdb | B     | 121  | 1htp.pdb | -     | 131  |
| 1tiv.pdb | -     | 86   | 1put.pdb | -     | 106  | 1whi.pdb | -     | 122  | 1lis.pdb | -     | 131  |
| 2abd.pdb | -     | 86   | 2fd2.pdb | -     | 106  | 1bjp.pdb | -     | 122  | 1slt.pdb | B     | 131  |
| 1ice.pdb | B     | 88   | 1etc.pdb | -     | 106  | 1yua.pdb | -     | 122  | 1kuh.pdb | -     | 132  |
| 1pue.pdb | E     | 88   | 1fkj.pdb | -     | 107  | 1reg.pdb | X     | 122  | 1lrl.pdb | -     | 133  |
| 1tpg.pdb | -     | 91   | 2cdv.pdb | -     | 107  | 1bp2.pdb | -     | 123  | 1jac.pdb | A     | 133  |
| 1pcn.pdb | -     | 93   | 1bri.pdb | C     | 107  | 1pdn.pdb | C     | 123  | 2tbd.pdb | -     | 134  |
| 1fbr.pdb | -     | 93   | 3sic.pdb | I     | 107  | 1htm.pdb | D     | 123  | 1poc.pdb | -     | 134  |
| 1who.pdb | -     | 94   | 1jpc.pdb | -     | 108  | 8ruc.pdb | I     | 123  | 1cof.pdb | -     | 135  |
| 1mol.pdb | A     | 94   | 1thx.pdb | -     | 108  | 1bur.pdb | T     | 123  | 1pms.pdb | -     | 135  |
| 1ihf.pdb | B     | 94   | 1hul.pdb | A     | 108  | 4fgf.pdb | -     | 124  | 1snc.pdb | -     | 135  |
| 1urn.pdb | A     | 96   | 1cew.pdb | I     | 108  | 7rsa.pdb | -     | 124  | 1dup.pdb | A     | 136  |

|           |   |     |          |   |     |          |   |     |          |   |     |
|-----------|---|-----|----------|---|-----|----------|---|-----|----------|---|-----|
| 1jvr.pdb  | - | 137 | 1wba.pdb | - | 171 | 1ebp.pdb | A | 211 | 2dri.pdb | - | 271 |
| 2end.pdb  | - | 137 | 1rci.pdb | - | 171 | 1edh.pdb | A | 211 | 1nsy.pdb | A | 271 |
| 1anu.pdb  | - | 138 | 1mka.pdb | A | 171 | 9pap.pdb | - | 212 | 1drw.pdb | - | 272 |
| 1gtq.pdb  | A | 138 | 2fha.pdb | - | 172 | 1vid.pdb | - | 213 | 1dih.pdb | - | 272 |
| 1pne.pdb  | - | 139 | 1lki.pdb | - | 172 | 1thj.pdb | A | 213 | 1qrd.pdb | A | 273 |
| 1vhi.pdb  | A | 139 | 2fcr.pdb | - | 173 | 1lbu.pdb | - | 213 | 2hhm.pdb | A | 273 |
| 1lcl.pdb  | - | 141 | 1prr.pdb | - | 173 | 2ayh.pdb | - | 214 | 1kxu.pdb | - | 276 |
| 1stm.pdb  | A | 141 | 1amm.pdb | - | 174 | 6fab.pdb | L | 214 | 1mhc.pdb | A | 276 |
| 1tfe.pdb  | - | 142 | 2prd.pdb | - | 174 | 1dkz.pdb | A | 215 | 1bro.pdb | A | 277 |
| 1pbx.pdb  | A | 142 | 4gcr.pdb | - | 174 | 1hav.pdb | A | 216 | 1daa.pdb | A | 277 |
| 1nhk.pdb  | L | 143 | 2scp.pdb | A | 174 | 2gst.pdb | A | 217 | 1pvc.pdb | I | 279 |
| 1lpe.pdb  | - | 144 | 1fcd.pdb | C | 174 | 1gpc.pdb | - | 218 | 2prk.pdb | - | 279 |
| 1tnr.pdb  | A | 144 | 2bpa.pdb | 2 | 175 | 1bbt.pdb | 3 | 220 | 1pyp.pdb | - | 280 |
| 1occ.pdb  | D | 144 | 1aoc.pdb | A | 175 | 1emk.pdb | - | 220 | 1ypt.pdb | B | 280 |
| 1pkp.pdb  | - | 145 | 1hng.pdb | A | 175 | 1jud.pdb | - | 220 | 1cnv.pdb | - | 283 |
| 3sdh.pdb  | A | 145 | 1hbq.pdb | - | 176 | 2brd.pdb | - | 221 | 1nlp.pdb | A | 283 |
| 1rai.pdb  | D | 145 | 1fro.pdb | A | 176 | 1akz.pdb | - | 223 | 1iol.pdb | - | 284 |
| 1vls.pdb  | - | 146 | 1cid.pdb | - | 177 | 1ad2.pdb | - | 224 | 2ebn.pdb | - | 285 |
| 1ash.pdb  | - | 146 | 1nfa.pdb | - | 178 | 2ak3.pdb | A | 226 | 1tml.pdb | - | 286 |
| 1vsd.pdb  | - | 146 | 3cd4.pdb | - | 178 | 1occ.pdb | B | 227 | 1han.pdb | - | 287 |
| 2fal.pdb  | - | 146 | 1vhr.pdb | A | 178 | 1nfp.pdb | - | 228 | 1xsm.pdb | - | 288 |
| 1was.pdb  | - | 146 | 1bpl.pdb | A | 179 | 1pya.pdb | B | 228 | 1scu.pdb | A | 288 |
| 8atc.pdb  | B | 146 | 1dlh.pdb | A | 180 | 1lau.pdb | E | 228 | 1nar.pdb | - | 289 |
| 1def.pdb  | - | 147 | 1ytb.pdb | A | 180 | 3pgm.pdb | - | 230 | 1pbn.pdb | - | 289 |
| 2hbg.pdb  | - | 147 | 1cau.pdb | A | 181 | 1lrv.pdb | - | 233 | 1qap.pdb | A | 289 |
| 2mta.pdb  | C | 147 | 1len.pdb | A | 181 | 1din.pdb | - | 234 | 1bpl.pdb | B | 290 |
| 1div.pdb  | - | 149 | 1lfa.pdb | A | 183 | 4rhv.pdb | 3 | 236 | 1nal.pdb | I | 291 |
| 1scm.pdb  | C | 149 | 2stv.pdb | - | 184 | 1dhr.pdb | - | 236 | 1ryc.pdb | - | 291 |
| 2aak.pdb  | - | 150 | 1pbw.pdb | A | 184 | 1ecp.pdb | A | 237 | 1amp.pdb | - | 291 |
| 1gds.pdb  | - | 151 | 1cau.pdb | B | 184 | 1lbd.pdb | - | 238 | 2cyp.pdb | - | 292 |
| 1rcy.pdb  | - | 151 | 1xnb.pdb | - | 185 | 1gdo.pdb | A | 238 | 2ora.pdb | - | 292 |
| 1sra.pdb  | - | 151 | 2sas.pdb | - | 185 | 1chk.pdb | A | 238 | 1dhp.pdb | A | 292 |
| 1ilk.pdb  | - | 151 | 153l.pdb | - | 185 | 1hsl.pdb | A | 238 | 1xva.pdb | A | 292 |
| 1ulp.pdb  | - | 152 | 1lts.pdb | A | 185 | 1dek.pdb | A | 240 | 1csn.pdb | - | 293 |
| 1mbd.pdb  | - | 153 | 1gky.pdb | - | 186 | 1pcr.pdb | H | 240 | 1sch.pdb | A | 293 |
| 1jcv.pdb  | - | 153 | 1knb.pdb | - | 186 | 1smn.pdb | A | 241 | 1ctt.pdb | - | 294 |
| 2gdm.pdb  | - | 153 | 1fbt.pdb | A | 186 | 1cyd.pdb | A | 242 | 1fjm.pdb | A | 294 |
| 1aep.pdb  | - | 153 | 1dsb.pdb | A | 188 | 1dph.pdb | - | 243 | 1gym.pdb | - | 296 |
| 1afb.pdb  | I | 154 | 1dlh.pdb | B | 188 | 1cns.pdb | A | 243 | 1fnc.pdb | - | 296 |
| 1mls.pdb  | - | 154 | 1ryt.pdb | - | 190 | 1rva.pdb | A | 244 | 1ptd.pdb | - | 296 |
| 1phr.pdb  | - | 154 | 1etp.pdb | A | 190 | 1bmt.pdb | A | 246 | 1lbi.pdb | A | 296 |
| 2tmv.pdb  | P | 154 | 1zxq.pdb | - | 192 | 1mrj.pdb | - | 247 | 1ptv.pdb | A | 297 |
| 1rbu.pdb  | - | 155 | 1vok.pdb | A | 192 | 1zym.pdb | A | 247 | 1cpo.pdb | - | 298 |
| 1esl.pdb  | - | 157 | 1isc.pdb | A | 192 | 1fib.pdb | - | 249 | 2por.pdb | - | 301 |
| 1hlb.pdb  | - | 157 | 1pnk.pdb | A | 193 | 5tim.pdb | A | 249 | 1esc.pdb | - | 302 |
| 1vhh.pdb  | - | 157 | 1tup.pdb | B | 194 | 1ctm.pdb | - | 250 | 1irk.pdb | - | 303 |
| 1jap.pdb  | A | 157 | 1shc.pdb | A | 195 | 1mml.pdb | - | 251 | 8abp.pdb | - | 303 |
| 1cyx.pdb  | - | 158 | 1vsc.pdb | A | 196 | 1vin.pdb | - | 252 | 1mla.pdb | - | 305 |
| 1gpr.pdb  | - | 158 | 1prt.pdb | B | 196 | 1nba.pdb | A | 253 | 1ecr.pdb | A | 305 |
| 1bcf.pdb  | A | 158 | 1cus.pdb | - | 197 | 1kny.pdb | A | 253 | 2dlm.pdb | - | 306 |
| 1obp.pdb  | A | 158 | 1col.pdb | A | 197 | 1tdt.pdb | A | 256 | 1ghr.pdb | - | 306 |
| 1hjr.pdb  | A | 158 | 1chd.pdb | - | 198 | 1yas.pdb | A | 256 | 2ctc.pdb | - | 307 |
| 1cyw.pdb  | - | 159 | 1bhm.pdb | A | 198 | 1plq.pdb | - | 258 | 1gca.pdb | - | 309 |
| 1svp.pdb  | A | 160 | 4sbv.pdb | A | 199 | 1eri.pdb | A | 261 | 1sbp.pdb | - | 309 |
| 1apy.pdb  | A | 161 | 1ber.pdb | A | 199 | 1occ.pdb | C | 261 | 1ede.pdb | - | 310 |
| 2arc.pdb  | A | 161 | 1vca.pdb | A | 199 | 1lxa.pdb | - | 262 | 8atc.pdb | A | 310 |
| 1klo.pdb  | - | 162 | 1cex.pdb | - | 197 | 1arb.pdb | - | 263 | 1pgs.pdb | - | 311 |
| 1std.pdb  | - | 162 | 1nox.pdb | - | 200 | 1rgs.pdb | - | 264 | 1dor.pdb | A | 311 |
| 3dfr.pdb  | - | 162 | 1gen.pdb | - | 200 | 1tys.pdb | - | 264 | 1svc.pdb | P | 311 |
| 1mmo.pdb  | G | 162 | 1iae.pdb | - | 200 | 3tgl.pdb | - | 265 | 2cmd.pdb | - | 312 |
| 1vmo.pdb  | A | 163 | 1atl.pdb | A | 200 | 1pvc.pdb | 2 | 266 | 1nfk.pdb | A | 312 |
| 1l68.pdb  | - | 164 | 2gsq.pdb | - | 202 | 1dea.pdb | A | 266 | 1ppr.pdb | M | 312 |
| 1l17.pdb  | - | 164 | 1sac.pdb | A | 204 | 1abr.pdb | B | 267 | 1hvd.pdb | - | 313 |
| 2cp1.pdb  | - | 164 | 1cfb.pdb | - | 205 | 2mev.pdb | I | 268 | 1gsa.pdb | - | 314 |
| 1lck.pdb  | A | 164 | 1dyr.pdb | - | 205 | 1ako.pdb | - | 268 | 1tag.pdb | - | 314 |
| 5p21.pdb  | - | 166 | 1huc.pdb | B | 205 | 1eny.pdb | - | 268 | 2acq.pdb | - | 315 |
| 1lice.pdb | A | 167 | 1fc2.pdb | D | 206 | 1nzy.pdb | A | 269 | 1ucw.pdb | A | 315 |
| 1mhy.pdb  | G | 167 | 1thv.pdb | - | 207 | 3fru.pdb | A | 269 | 8tln.pdb | E | 316 |
| 1rcf.pdb  | - | 169 | 1fua.pdb | - | 206 | 1xjo.pdb | - | 270 | 1tca.pdb | - | 317 |
| 1aih.pdb  | A | 170 | 2abk.pdb | - | 211 | 1ndh.pdb | - | 270 | 1ckm.pdb | A | 317 |

|          |   |     |           |   |     |          |   |      |
|----------|---|-----|-----------|---|-----|----------|---|------|
| 1tah.pdb | A | 318 | 1ivd.pdb  | - | 388 | 1aoz.pdb | A | 552  |
| 1xyz.pdb | A | 320 | 1scu.pdb  | B | 388 | 1pnk.pdb | B | 557  |
| 2abh.pdb | - | 321 | 1ubs.pdb  | B | 389 | 3pmg.pdb | A | 561  |
| 1quk.pdb | - | 321 | 1nsc.pdb  | A | 390 | 2kau.pdb | C | 566  |
| 2pia.pdb | - | 321 | 1pbe.pdb  | - | 391 | 4aah.pdb | A | 571  |
| 1pot.pdb | - | 322 | 4xia.pdb  | A | 393 | 1vnc.pdb | - | 576  |
| 1poy.pdb | 1 | 323 | 1svb.pdb  | - | 395 | 1gal.pdb | - | 581  |
| 1axn.pdb | - | 323 | 2tys.pdb  | B | 396 | 1dlc.pdb | - | 584  |
| 1prc.pdb | M | 323 | 1oyc.pdb  | - | 399 | 1pox.pdb | A | 585  |
| 1bpy.pdb | A | 326 | 1inp.pdb  | - | 400 | 1tf4.pdb | A | 605  |
| 1qor.pdb | A | 326 | 1chm.pdb  | A | 401 | 1aor.pdb | A | 605  |
| 1hmy.pdb | - | 327 | 1fcd.pdb  | A | 401 | 1sly.pdb | - | 618  |
| 1hge.pdb | A | 328 | 1oxa.pdb  | - | 403 | 1gof.pdb | - | 639  |
| 1sme.pdb | A | 329 | 1psd.pdb  | A | 404 | 1trk.pdb | A | 678  |
| 3pga.pdb | 1 | 329 | 1left.pdb | - | 405 | 1cyg.pdb | - | 680  |
| 1dxy.pdb | - | 330 | 1phg.pdb  | - | 405 | 1tcm.pdb | A | 686  |
| 1prc.pdb | C | 332 | 1iso.pdb  | - | 414 | 1lcf.pdb | - | 690  |
| 1nif.pdb | - | 333 | 1qpg.pdb  | - | 415 | 1aa6.pdb | - | 696  |
| 1arv.pdb | - | 336 | 2amg.pdb  | - | 415 | 1oac.pdb | A | 719  |
| 1atp.pdb | E | 336 | 1gtm.pdb  | A | 417 | 1vsg.pdb | A | 362  |
| 2dld.pdb | A | 337 | 1uae.pdb  | - | 418 | 2tmd.pdb | A | 729  |
| 1xel.pdb | - | 338 | 1mal.pdb  | - | 421 | 8acn.pdb | - | 753  |
| 1pnr.pdb | A | 338 | 1ses.pdb  | A | 421 | 1kit.pdb | - | 757  |
| 1kif.pdb | A | 339 | 1kbp.pdb  | A | 424 | 1gpb.pdb | - | 823  |
| 1got.pdb | B | 339 | 2bpa.pdb  | 1 | 426 | 1qba.pdb | - | 863  |
| 1uxy.pdb | - | 340 | 1gnd.pdb  | - | 430 | 1alo.pdb | - | 907  |
| 1mbb.pdb | - | 340 | 2dkb.pdb  | - | 431 | 1bgl.pdb | A | 1021 |
| 2omf.pdb | - | 340 | 1ade.pdb  | A | 431 |          |   |      |
| 1aa8.pdb | A | 340 | 1gpl.pdb  | - | 432 |          |   |      |
| 1xik.pdb | A | 340 | 1csh.pdb  | - | 435 |          |   |      |
| 1rib.pdb | A | 340 | 4enl.pdb  | - | 436 |          |   |      |
| 1rpa.pdb | - | 342 | 1pmi.pdb  | - | 440 |          |   |      |
| 2liv.pdb | - | 344 | 1ad3.pdb  | A | 446 |          |   |      |
| 1xaa.pdb | - | 345 | 1hqa.pdb  | A | 446 |          |   |      |
| 1afr.pdb | A | 345 | 1nhp.pdb  | - | 447 |          |   |      |
| 3pte.pdb | - | 347 | 1alk.pdb  | A | 449 |          |   |      |
| 1sva.pdb | 1 | 348 | 1gcb.pdb  | - | 452 |          |   |      |
| 1uby.pdb | - | 348 | 1pii.pdb  | - | 452 |          |   |      |
| 1bvp.pdb | 1 | 349 | 1bp1.pdb  | - | 456 |          |   |      |
| 1fkx.pdb | - | 349 | 2bnh.pdb  | - | 456 |          |   |      |
| 1pax.pdb | - | 350 | 2hpd.pdb  | A | 457 |          |   |      |
| 1ped.pdb | A | 351 | 1jsw.pdb  | A | 459 |          |   |      |
| 1air.pdb | - | 352 | 3grs.pdb  | - | 461 |          |   |      |
| 1kob.pdb | A | 353 | 1gph.pdb  | 1 | 465 |          |   |      |
| 2mnr.pdb | - | 357 | 1mhl.pdb  | C | 466 |          |   |      |
| 1ece.pdb | A | 358 | 1bmf.pdb  | D | 467 |          |   |      |
| 2blt.pdb | A | 359 | 1sat.pdb  | - | 468 |          |   |      |
| 1eur.pdb | - | 361 | 1gln.pdb  | - | 468 |          |   |      |
| 1cem.pdb | - | 363 | 1dnp.pdb  | A | 469 |          |   |      |
| 2pol.pdb | A | 366 | 1kap.pdb  | P | 470 |          |   |      |
| 1pea.pdb | - | 368 | 2pgd.pdb  | - | 473 |          |   |      |
| 1fnf.pdb | - | 368 | 6taa.pdb  | - | 476 |          |   |      |
| 1mda.pdb | H | 368 | 1dpg.pdb  | A | 485 |          |   |      |
| 1omp.pdb | - | 370 | 1bmf.pdb  | A | 487 |          |   |      |
| 1pud.pdb | - | 372 | 1cow.pdb  | A | 487 |          |   |      |
| 1noy.pdb | A | 372 | 1gow.pdb  | A | 489 |          |   |      |
| 1dos.pdb | A | 373 | 1byb.pdb  | - | 490 |          |   |      |
| 1cdo.pdb | A | 374 | 1asz.pdb  | A | 490 |          |   |      |
| 2btf.pdb | A | 374 | 1smd.pdb  | - | 495 |          |   |      |
| 2nac.pdb | A | 374 | 8cat.pdb  | A | 498 |          |   |      |
| 1kaz.pdb | - | 378 | 1dpe.pdb  | - | 507 |          |   |      |
| 1hpm.pdb | - | 378 | 1mmo.pdb  | D | 512 |          |   |      |
| 1edg.pdb | - | 380 | 1occ.pdb  | A | 514 |          |   |      |
| 1crk.pdb | A | 380 | 2olb.pdb  | A | 517 |          |   |      |
| 2sil.pdb | - | 381 | 1pkm.pdb  | - | 519 |          |   |      |
| 1ofg.pdb | A | 381 | 2min.pdb  | B | 522 |          |   |      |
| 1sft.pdb | A | 382 | 1crl.pdb  | - | 534 |          |   |      |
| 1buc.pdb | A | 383 | 1ctn.pdb  | - | 538 |          |   |      |
| 1mty.pdb | B | 384 | 1clc.pdb  | - | 541 |          |   |      |
| 1mmo.pdb | B | 384 | 2cas.pdb  | - | 548 |          |   |      |
